# Supplementary material for: Removal of Parasite Transmission Stages from Berries Using Washing Procedures Suitable for Consumers
Source: MDPI journal article supplement (doi:10.3390/foods10020481), 2021-02-23
Supplement: s1 [file s1]

Supplementary file 1

1. Standard curve for *Cyclospora cayetanensis* quantification from raspberry spikes

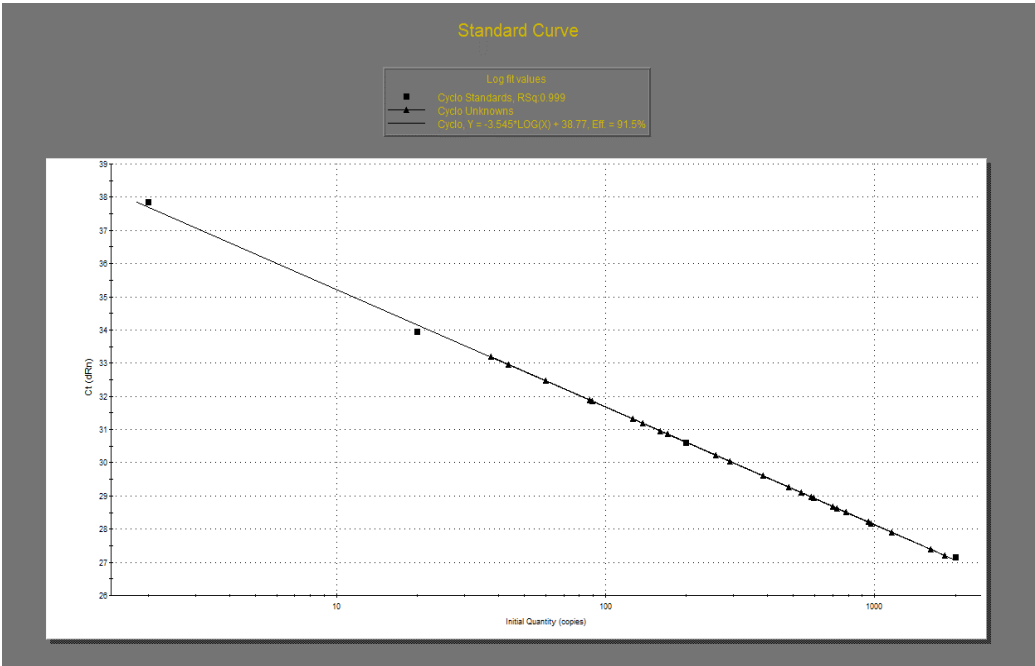

2. Standard curve for *Cyclospora cayetanensis* quantification from blueberries spikes

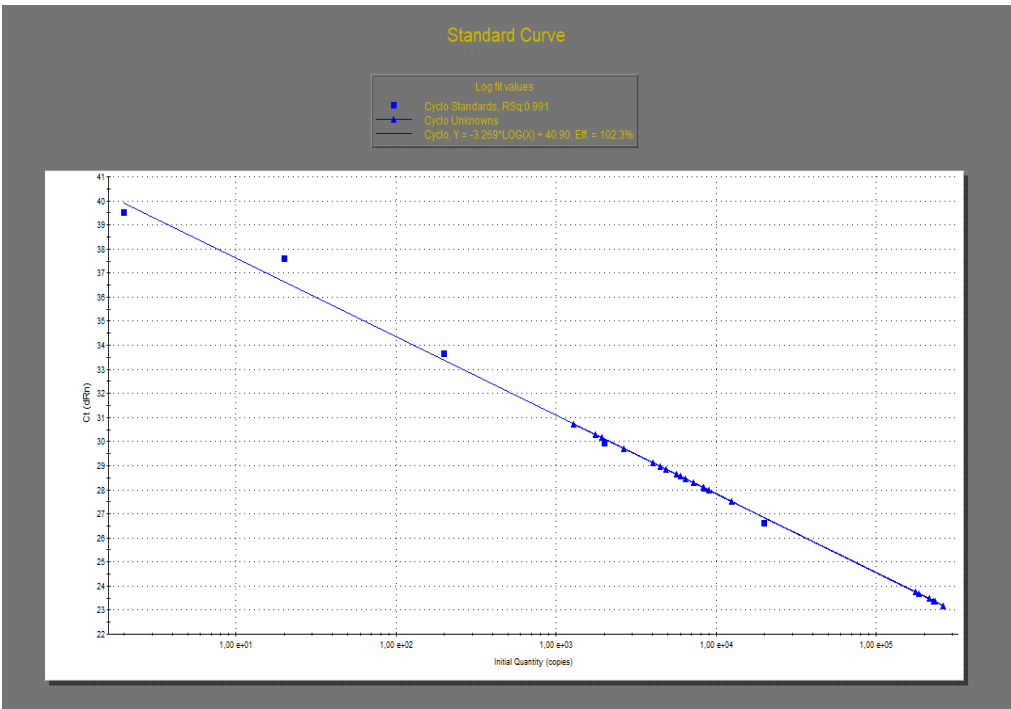

### 3. Standard curve for *Giardia duodenalis* quantification from raspberries spikes

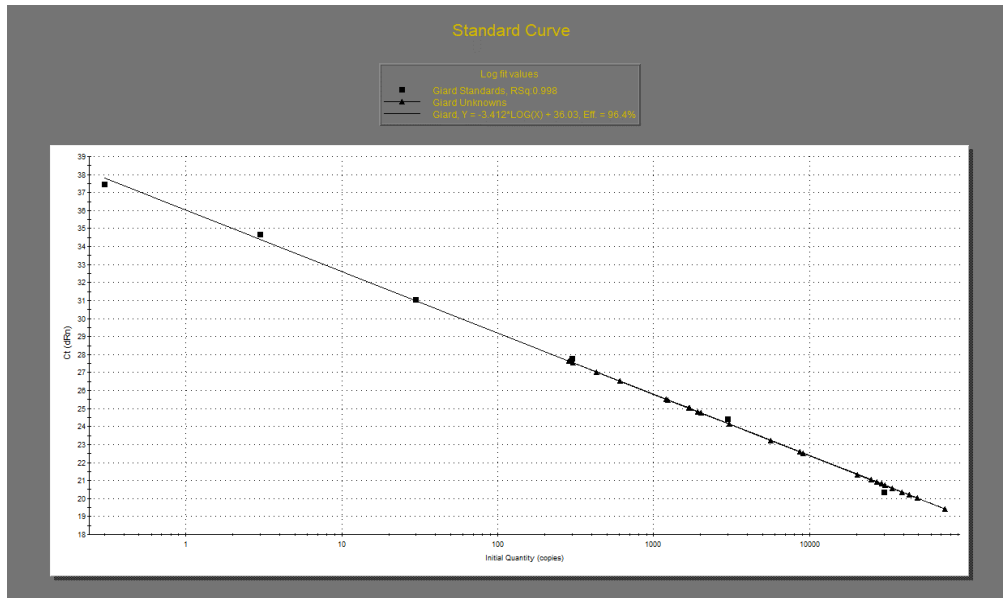

#### 4. Standard curve for *Giardia duodenalis* quantification from blueberries spikes

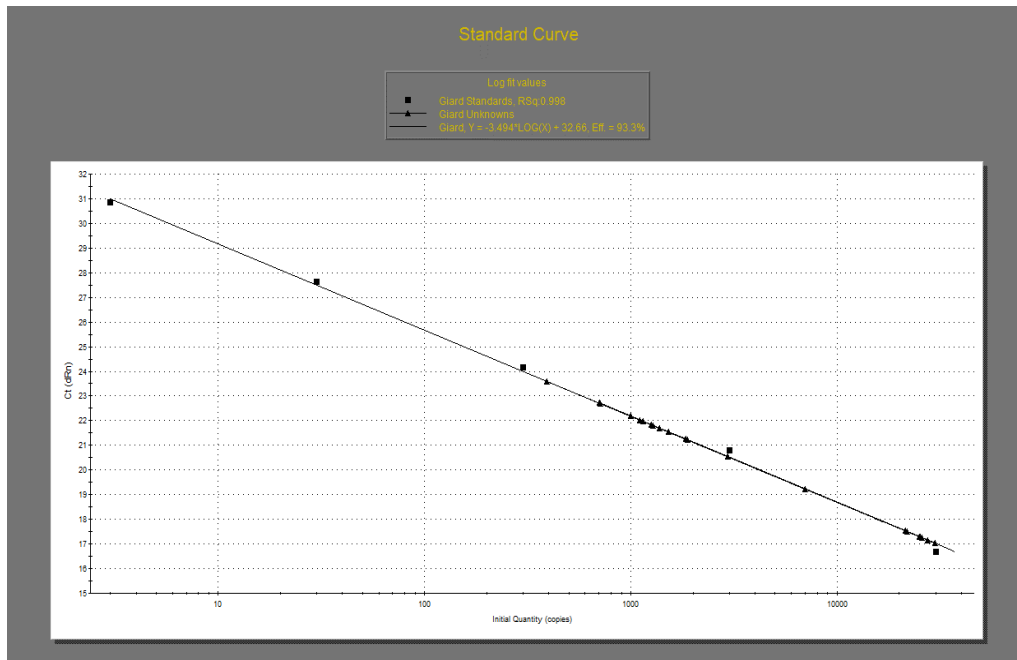

5. Standard curve for *Cryptosporidium parvum* quantification from blueberries spikes

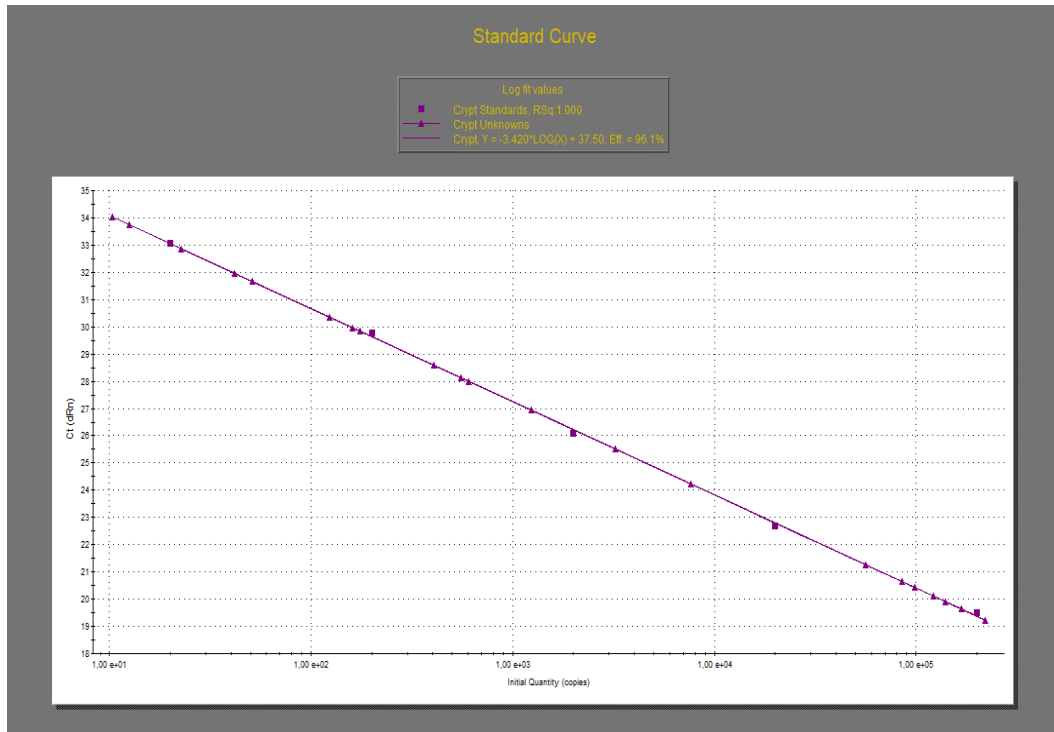

6. Standard curve for *Cryptosporidium parvum* quantification from raspberries spikes

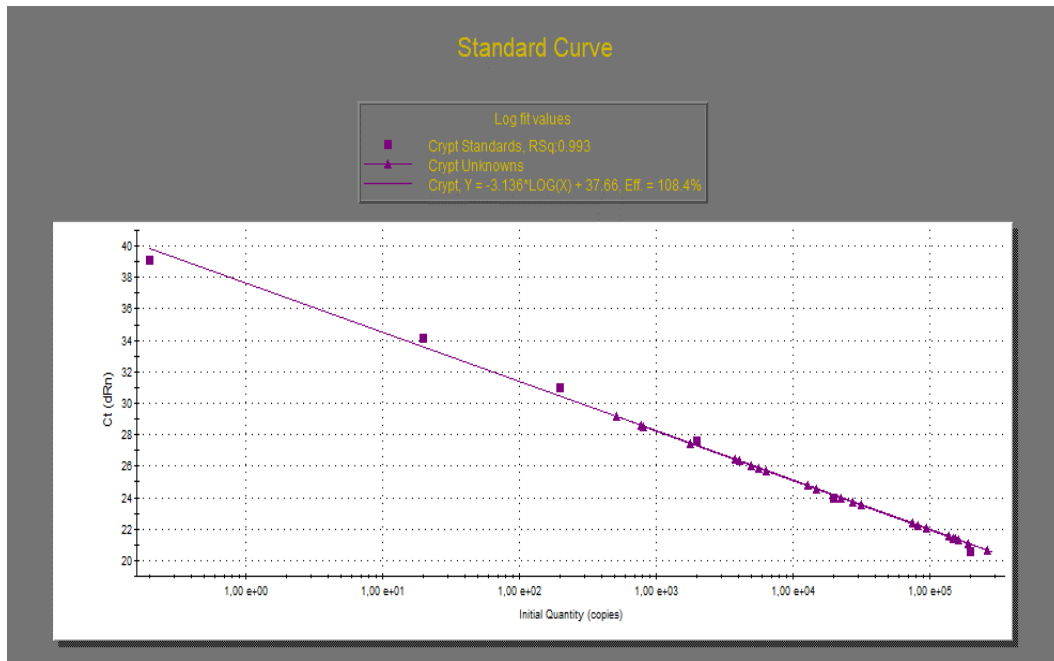

## Supplementary file 2.

This file presents the qPCR results and estimated removal efficacy, in percentage, of each washing alternatives. The washing alternatives included Running water (RW), Vinegar (VG), and salad spinner (SP).

Table 1. Detection and quantification of *Cryptosporidium parvum* from blueberries samples.

| Well Name | Well Type        | Ct (dRn) | Estimated no. of oocysts | % removed |
|-----------|------------------|----------|--------------------------|-----------|
| RW-1      | Unknown          | 25.5     | 3224                     | 96.44     |
| RW-2      | Unknown          | 24.23    | 7625                     | 91.57     |
| RW-3      | Unknown          | 30.34    | 124.1                    | 99.86     |
| RW-4      | Unknown          | 32.86    | 22.77                    | 99.97     |
| RW-5      | Unknown          | 28.59    | 405                      | 99.55     |
| VG-1      | Unknown          | 31.95    | 41.9                     | 99.95     |
| VG-2      | Unknown          | 29.83    | 174.6                    | 99.81     |
| VG-3      | Unknown          | 31.66    | 51.09                    | 99.94     |
| VG-4      | Unknown          | 27.99    | 605.8                    | 99.33     |
| VG-5      | Unknown          | 26.93    | 1234                     | 98.64     |
| SP-1      | Unknown          | 33.75    | 12.54                    | 99.99     |
| SP-2      | Unknown          | 34.03    | 10.36                    | 99.99     |
| SP-3      | Unknown          | 29.95    | 161.2                    | 99.82     |
| SP-4      | Unknown          | 28.11    | 556.1                    | 99.39     |
| SP-5      | Unknown          | 37.78    | 0.8316                   | 99.99     |
| C-1       | Unknown          | 21.26    | 56070                    | NA        |
| C-2       | Unknown          | 20.42    | 98510                    | NA        |
| C-3       | Unknown          | 20.11    | 121600                   | NA        |
| C-4       | Unknown          | 20.63    | 85630                    | NA        |
| NC        | Negative control | No Ct    | No Ct                    | NA        |

Table 2. Detection and quantification of *Giardia duodenalis* from blueberries samples.

| Well Name | Well Type        | Ct (dRn) | Estimated no. of cysts | % removed |
|-----------|------------------|----------|------------------------|-----------|
| RW-1      | Unknown          | 22.18    | 9.99E+02               | 96.07     |
| RW-2      | Unknown          | 21.97    | 1.15E+03               | 95.47     |
| RW-3      | Unknown          | 22.7     | 7.09E+02               | 97.21     |
| RW-4      | Unknown          | 21.54    | 1.52E+03               | 94.01     |
| RW-5      | Unknown          | 20.54    | 2.95E+03               | 88.41     |
| VG-1      | Unknown          | 21.81    | 1.28E+03               | 94.97     |
| VG-2      | Unknown          | 22.71    | 7.04E+02               | 97.23     |
| VG-3      | Unknown          | 21.7     | 1.37E+03               | 94.60     |
| VG-4      | Unknown          | 21.23    | 1.88E+03               | 92.62     |
| VG-5      | Unknown          | 21.83    | 1.26E+03               | 95.04     |
| SP-1      | Unknown          | 22.03    | 1.11E+03               | 95.64     |
| SP-2      | Unknown          | 21.83    | 1.26E+03               | 95.04     |
| SP-3      | Unknown          | 22.03    | 1.11E+03               | 95.64     |
| SP-4      | Unknown          | 23.6     | 3.93E+02               | 98.46     |
| SP-5      | Unknown          | 21.25    | 1.84E+03               | 92.75     |
| C-1       | Unknown          | 19.23    | 6.99E+03               | NA        |
| C-2       | Unknown          | 17.53    | 2.15E+04               | NA        |
| C-3       | Unknown          | 17.3     | 2.50E+04               | NA        |
| C-4       | Unknown          | 17.02    | 3.00E+04               | NA        |
| C-5       | Unknown          | 17.28    | 2.53E+04               | NA        |
| NC        | Negative control | No Ct    | NA                     | NA        |

Table 3. Detection and quantification of *Cyclospora cayetanensis* from blueberries samples.

| Well Name | Well Type        | Ct (dRn) | Estimated no. of oocysts | % removed |
|-----------|------------------|----------|--------------------------|-----------|
| RW-1      | Unknown          | 28.55    | 6.00E+03                 | 97.22     |
| RW-2      | Unknown          | 27.5     | 1.26E+04                 | 94.17     |
| RW-3      | Unknown          | 28.96    | 4.51E+03                 | 97.91     |
| RW-4      | Unknown          | 28.28    | 7.26E+03                 | 96.63     |
| RW-5      | Unknown          | 28.08    | 8.37E+03                 | 96.12     |
| VG-1      | Unknown          | 30.15    | 1.95E+03                 | 99.10     |
| VG-2      | Unknown          | 28.45    | 6.43E+03                 | 97.02     |
| VG-3      | Unknown          | 27.98    | 9.00E+03                 | 95.83     |
| VG-4      | Unknown          | 30.73    | 1.29E+03                 | 99.40     |
| VG-5      | Unknown          | 28.63    | 5.68E+03                 | 97.37     |
| SP-1      | Unknown          | 30.28    | 1.77E+03                 | 99.18     |
| SP-2      | Unknown          | 28.07    | 8.40E+03                 | 96.11     |
| SP-3      | Unknown          | 29.12    | 4.03E+03                 | 98.13     |
| SP-4      | Unknown          | 30.29    | 1.77E+03                 | 99.18     |
| SP-5      | Unknown          | 28.84    | 4.89E+03                 | 97.73     |
| C-1       | Unknown          | 29.71    | 2.66E+03                 | NA        |
| C-2       | Unknown          | 23.35    | 2.33E+05                 | NA        |
| C-3       | Unknown          | 23.68    | 1.85E+05                 | NA        |
| C-4       | Unknown          | 23.38    | 2.29E+05                 | NA        |
| C-5       | Unknown          | 23.47    | 2.15E+05                 | NA        |
| NC        | Negative control | No Ct    | NA                       | NA        |

Table 4. Detection and quantification of *Cryptosporidium parvum* from raspberries samples.

| Well Name | Well Type        | Ct (dRn) | Estimated no. of oocysts | % removed |
|-----------|------------------|----------|--------------------------|-----------|
| RW-1      | Unknown          | 24.79    | 6.36E+03                 | 94.45     |
| RW-2      | Unknown          | 23.57    | 1.45E+04                 | 87.37     |
| RW-3      | Unknown          | 23.73    | 1.29E+04                 | 88.69     |
| RW-4      | Unknown          | 22.45    | 3.06E+04                 | 73.26     |
| RW-5      | Unknown          | 22.86    | 2.32E+04                 | 79.69     |
| VG-1      | Unknown          | 23.59    | 1.42E+04                 | 87.61     |
| VG-2      | Unknown          | 27.76    | 8.65E+02                 | 99.24     |
| VG-3      | Unknown          | 25.17    | 4.91E+03                 | 95.71     |
| VG-4      | Unknown          | 26.35    | 2.22E+03                 | 98.06     |
| VG-5      | Unknown          | 25.31    | 4.48E+03                 | 96.09     |
| SP-1      | Unknown          | 24.68    | 6.86E+03                 | 94.01     |
| SP-2      | Unknown          | 24.86    | 6.07E+03                 | 94.70     |
| SP-3      | Unknown          | 26.96    | 1.48E+03                 | 98.71     |
| SP-4      | Unknown          | 27.33    | 1.15E+03                 | 98.99     |
| SP-5      | Unknown          | 22.57    | 2.82E+04                 | 75.36     |
| C-1       | Unknown          | 20.35    | 1.26E+05                 | NA        |
| C-2       | Unknown          | 20.47    | 1.16E+05                 | NA        |
| C-3       | Unknown          | 20.3     | 1.30E+05                 | NA        |
| C-4       | Unknown          | 20.45    | 1.18E+05                 | NA        |
| C-5       | Unknown          | 20.96    | 8.33E+04                 | NA        |
| NC        | Negative control | No Ct    | NA                       | NA        |

Table 5. Detection and quantification of *Giardia duodenalis* from raspberries samples.

| Well Name | Well Type        | Ct (dRn) | Estimated no. of cysts | % removed |
|-----------|------------------|----------|------------------------|-----------|
| RW-1      | Unknown          | 23.23    | 5.67E+03               | 87.97     |
| RW-2      | Unknown          | 22.52    | 9.11E+03               | 80.67     |
| RW-3      | Unknown          | 25.48    | 1.24E+03               | 97.37     |
| RW-4      | Unknown          | 21.03    | 2.48E+04               | 47.26     |
| RW-5      | Unknown          | 22.6     | 8.63E+03               | 81.67     |
| VG-1      | Unknown          | 26.53    | 6.07E+02               | 98.71     |
| VG-2      | Unknown          | 27.65    | 2.86E+02               | 99.39     |
| VG-3      | Unknown          | 25.01    | 1.70E+03               | 96.39     |
| VG-4      | Unknown          | 27.56    | 3.04E+02               | 99.36     |
| VG-5      | Unknown          | 24.76    | 2.01E+03               | 95.73     |
| SP-1      | Unknown          | 25.03    | 1.68E+03               | 96.43     |
| SP-2      | Unknown          | 24.83    | 1.92E+03               | 95.92     |
| SP-3      | Unknown          | 25.52    | 1.21E+03               | 97.44     |
| SP-4      | Unknown          | 27.04    | 4.33E+02               | 99.08     |
| SP-5      | Unknown          | 24.14    | 3.05E+03               | 93.52     |
| CT-1      | Unknown          | 20.35    | 3.93E+04               | NA        |
| CT-2      | Unknown          | 20.81    | 2.89E+04               | NA        |
| CT-3      | Unknown          | 20.02    | 4.94E+04               | NA        |
| CT-4      | Unknown          | 20.2     | 4.36E+04               | NA        |
| CT-5      | Unknown          | 19.41    | 7.43E+04               | NA        |
| NC        | Negative control | No Ct    | NA                     | NA        |



Table 6. Detection and quantification of *Cyclospora cayetanensis* from raspberries samples.

| Well Name | Well Type        | Ct (dRn) | Estimated no. of oocysts | % removed |
|-----------|------------------|----------|--------------------------|-----------|
| RW-1      | Unknown          | 30.22    | 2.57E+02                 | 68.61     |
| RW-2      | Unknown          | 29.6     | 3.85E+02                 | 52.97     |
| RW-3      | Unknown          | 28.93    | 5.95E+02                 | 27.41     |
| RW-4      | Unknown          | 28.63    | 7.26E+02                 | 11.41     |
| RW-5      | Unknown          | 29.1     | 5.34E+02                 | 34.88     |
| VG-1      | Unknown          | 31.31    | 1.27E+02                 | 84.52     |
| VG-2      | Unknown          | 33.19    | 3.76E+01                 | 95.41     |
| VG-3      | Unknown          | 30.86    | 1.71E+02                 | 79.18     |
| VG-4      | Unknown          | 31.85    | 8.95E+01                 | 89.07     |
| VG-5      | Unknown          | 31.19    | 1.38E+02                 | 83.19     |
| SP-1      | Unknown          | 32.46    | 6.00E+01                 | 92.67     |
| SP-2      | Unknown          | 31.88    | 8.78E+01                 | 89.28     |
| SP-3      | Unknown          | 30.96    | 1.60E+02                 | 80.48     |
| SP-4      | Unknown          | 32.96    | 4.35E+01                 | 94.69     |
| SP-5      | Unknown          | 30.04    | 2.91E+02                 | 64.51     |
| CT-1      | Unknown          | 28.68    | 7.00E+02                 | NA        |
| CT-2      | Unknown          | 28.51    | 7.85E+02                 | NA        |
| CT-3      | Unknown          | 29.26    | 4.81E+02                 | NA        |
| CT-4      | Unknown          | 27.91    | 1.16E+03                 | NA        |
| CT-5      | Unknown          | 28.18    | 9.73E+02                 | NA        |
| NC        | Negative control | No Ct    | No Ct                    | NA        |
